1 Empirical modelling of trait selection by partitioning  
2 selection into direct selection and selection that is  
3 mediated by interspecific interactions

---

4 *Christian Damgaard, Bioscience, Aarhus University, Vejlsovej 25, 8600 Silkeborg,*  
5 *Denmark - [cfed@dmu.dk](mailto:cfed@dmu.dk)*

## 6 **Abstract**

7 Trait selection has received considerable attention in the pursuit to understand niche-based community  
8 assembly processes and to generate ecological predictions. To further advance the study of trait selection,  
9 a conceptual statistical model is presented that outlines and discuss the possibilities of i) estimating the  
10 effect of interspecific interactions on traits rather than just testing whether selection has had an effect on  
11 the observed trait distributions, ii) discriminating between environmental filtering and niche partitioning  
12 processes and estimate the characteristic features and importance of both processes, and iii) predicting the  
13 effect of environmental changes and gradients on trait selection. To achieve these goals a number of  
14 necessary assumptions have to be specified and these assumptions are discussed and assessed. Simulated  
15 plant cover data from a simple uniform environment was successfully fitted to the model and the results  
16 indicates that it is possible to partition direct population growth and population growth that is mediated by  
17 interspecific interaction. The data requirements of the model are modest, i.e. time series data on plant  
18 species abundance and a species – trait matrix. Consequently, the model concept may be used to model  
19 trait selection, including the effect of interspecific interactions, in many existing plant ecological datasets.

20 **Keywords:** interspecific interactions; competition; trait selection; selection model; directional selection;  
21 stabilizing selection; disruptive selection; plant cover

## 22 Introduction

23 Interspecific interactions among neighbouring plants typically arise because the resources needed for plant  
24 growth and reproduction are limited, and the plant that extracts or monopolizes most of the limiting  
25 resources will grow faster and reproduce in greater numbers (e.g., Goldberg et al., 1990; Weiner, 1986).  
26 The possibly important role of interspecific interactions in regulating natural plant communities and  
27 determining community assembly rules (e.g., Gotelli and McCabe, 2002; Kraft et al., 2015b; Silvertown et  
28 al., 1999; Weiher et al., 1998) has been investigated in a multitude of studies using different methods  
29 (Damgaard, 2011). However, considering its high ecological relevance and status as a classic research  
30 question in plant population ecology, it is noteworthy that only relatively few studies have measured the  
31 direct effect of interspecific interactions on plant performance and its role for regulating plant communities  
32 in undisturbed natural communities, and the results are still too sparse to allow much generalization across  
33 different plant communities or even among years (Turnbull et al., 2004). This paradox is due to the fact that  
34 the measurement of interspecific interactions in natural ecosystems is a non-trivial task (Damgaard, 2011),  
35 and applicable methods for measuring interspecific interactions in natural ecosystems is needed in order to  
36 make progress in understanding community assembly rules and making quantitative ecological predictions  
37 on the effect of environmental changes on biodiversity.

38 An increasingly popular way of describing plant communities is to focus on the expressed phenotypes of  
39 the plant species, i.e. plant traits, rather than on the species itself. The advantage is that plant traits are  
40 characteristic features, which to a certain extent will determine the survival, growth and reproductive  
41 strategies of the species, and are expected to respond in a more predictable way to an altered environment  
42 than the observed change in species composition (Garnier et al., 2004; Garnier et al., 2016; Shipley, 2010a).  
43 Furthermore, plant traits involved in resource acquisition and use at the species level will scale-up to  
44 ecosystem functioning, provided that traits are weighed by the species' contribution to the community  
45 (Garnier et al., 2007; Lavorel and Garnier, 2002).

46 Broadly speaking, a trait selection response is caused by i) environmental or biotic filtering processes where  
47 the abiotic and biotic environment selects for a certain combination of plant traits that have a relatively  
48 high adaptive value in the specific environment independent of the other plant species in the population,  
49 i.e. the fundamental niche (Hutchinson, 1957), and ii) competitive or facilitative processes where the trait  
50 selection response depends on the traits of the other plant species in the population, i.e. the realized niche  
51 (Hutchinson, 1957). The resulting observed selection response on individual traits after both selection  
52 processes has operated may be classified into either i) directional selection, where either relatively high or  
53 low trait values are favored, ii) stabilizing selection, where specific intermediary trait values are favored  
54 over all other trait values, or iii) disruptive selection, where extreme values for a trait are favored over  
55 intermediate values.

56 It is important not to confuse the selection processes with the resulting observed selection response, since  
57 multiple assembly processes has been shown to lead to the same pattern of trait dispersion and the same  
58 process can lead to different patterns of trait dispersion (Herben and Goldberg, 2014). However, it would  
59 be valuable to be able to distinguish between the two types of selection processes from observed changes  
60 in the distribution of plant traits since the two different selection processes lead to different expectations  
61 of community dynamics including species coexistence and niche-based community assembly processes (e.g.  
62 Chesson, 2000; Mayfield and Levine, 2010).

63 The trait selection process has previously been described by a two-step process in a meta-community  
64 model, where plants from a regional species pool are dispersed to a local habitat, and trait filtering  
65 excludes individuals with unfit trait values, and within the local species pool, trait values may influence  
66 performance, which may lead to patterns of trait convergence or divergence (e.g. Bernard-Verdier et al.,  
67 2012; Webb et al., 2010). The selection due to performance differences in the local species pool is thought  
68 to be mediated by interspecific interactions as the difference between the fundamental niche and the  
69 realized niche of the local species. Under this framework, the effect of interspecific interactions is detected

70 from deviations of the observed trait distribution from random expectations in the local species pool. If the  
71 variance of the observed trait distribution is lower than the random expectations, this is an indication of  
72 directional or stabilizing selection (convergent trait distribution pattern). Conversely, if the variance of the  
73 observed trait distribution is higher than the random expectations, this is an indication of disruptive  
74 selection (divergent trait distribution pattern).

75 Using such test procedures, several plant ecological studies have reported non-random trait dispersion  
76 distributions in favor of different niche-based community assembly hypotheses compared to the neutral  
77 hypothesis of plant community assembly (Weiher et al., 2011). However, this test procedure has been  
78 criticized by e.g. Adler et al. (2013), who argue that trait dispersion tests have low power to detect niche  
79 partitioning, and that patterns typically interpreted as either environmental filtering or niche partitioning  
80 may be generated by the same process. Most importantly, Adler et al. (2013) note that: “The common  
81 interpretation is that species interactions play no role in the abiotic environmental filtering process, while  
82 abiotic factors play no role in the competitively driven niche partitioning process. However, the dichotomy  
83 between environmental filtering and niche partitioning can arise from an arbitrary decision about the  
84 spatial scale of analysis, not from distinct biological processes”.

85 In a seminal work using maximum entropy models Shipley (2010a; 2010b) estimated the selection response  
86 from change in plant abundance. The maximum entropy models have the large advantage that it is not  
87 necessary to specify detailed models on selection mechanisms or how the different traits interact  
88 (Baastrup-Spohr et al., 2015; Shipley, 2010a; Shipley, 2010b), but this advantage is also their main  
89 drawback, since the method does not allow for discriminating between different selection models or  
90 whether selection is occurring due to environmental filtering or niche partitioning processes.

91 Consequently, in order to make progress in the understanding of the role and nature of niche-based  
92 community assembly processes in the structuring of plant communities, it would be beneficial to be able i)  
93 to estimate the effect of interspecific interactions on traits rather than just testing whether selection has

94 had an effect on the observed trait distributions, ii) to discriminate between environmental filtering and  
95 niche partitioning processes and estimate the characteristic features and importance of both processes,  
96 and iii) to predict the effect of environmental changes and gradients on trait selection.

97 To meet these objectives, I present a method for estimating the effect of species trait values on observed  
98 population growth in a plant community by estimating parameters in two complementary population  
99 growth functions, which partition the observed change in trait distribution of plant population into i) a  
100 direct selection process that is independent of the trait distribution of the plant population, which mainly is  
101 assumed to arise from environmental filtering processes, and ii) a selection process mediated by  
102 interspecific interaction that depend on the trait distribution of the plant population, which mainly is  
103 assumed to arise from the niche partitioning processes of competition and facilitation. The resulting model  
104 is a one-step trait selection process where the effects of plant traits on population growth is estimated  
105 from simple longitudinal plant cover data in an approach that is similar to the approach suggested by Lande  
106 and Arnold (1983) to measure selection on correlated characters, but where the effect of traits on  
107 population growth is partitioned into direct population growth and population growth that is mediated by  
108 interspecific interaction (also see Laughlin et al., 2015; Laughlin et al., 2012). The model operates locally  
109 and is conceptually simpler than the two-step meta-community model that previously has been used (e.g.  
110 Bernard-Verdier et al., 2012; Webb et al., 2010). Furthermore, a one-step trait selection response is  
111 probably a more realistic model of the selection process, since there are no compelling reasons for why the  
112 processes of environmental filtering and niche partitioning should not operate simultaneously.

113 The modest aim of this paper is only to present the model concept and for demonstration purposes to  
114 apply it on a toy example. As explained later there are a multitude of possible selection processes, that may  
115 be modelled using the model concept and it is meaningless to explore the fitting properties of all the  
116 different combinations; except in the context of a genuine plant ecological example.

## 117 Model

118 A plant community has  $n$  plant species that are characterized by  $m$  species-specific plant traits, which are  
119 known to be important for plant growth and demography. The plant traits are stored in a species-trait  
120 matrix,  $\mathbf{T}_{n,m}$ , with  $n$  rows and  $m$  columns.

121 The relative local abundance of the plant species is measured by either biomass or cover at time  $t$ ,  $q_{j,t}$ ,  
122 where  $\sum_{j=1}^n q_{j,t} = 1$ . The plants grow, die and reproduce under the influence of interspecific interactions at  
123 a given environment where certain combinations of plant traits have a positive effect on growth and  
124 reproduction, and other combinations of plant traits have a negative effect on growth and reproduction  
125 (compare with Lande and Arnold, 1983).

126 The predicted cover the following year of plant species  $j$  with trait values  $t_k = x$  is determined by (Fig. 1),

$$127 \quad q'_j = q_j \sum_{k=1}^m \left( F_k(x) \left( \sum_{y \in \Omega(t_k)} C_k(x, y) q_{t_k=y} \right) \right) + \varepsilon \quad (1),$$

128 where  $F_k(x)$  is the direct population growth function of plant species with trait value  $x$  for plant trait  $k$ ,  
129 and  $C_k(x, y)$  is a function that models the effect of interspecific interactions on population growth of plant  
130 species with trait value  $x$  for plant trait  $k$ , where the interspecific interaction of plant species with trait  
131 value  $x$  and  $y$  is modelled by a distance function, i. e. the effect of species interaction between two species  
132 on population growth is determined by the difference in trait values between the two species.

133 The population growth functions  $F_k(x)$  and  $C_k(x, y)$  may vary according to plant life forms, habitat type,  
134 and existing prior knowledge of e.g. the type of selection on the different traits. For example, the following  
135 model may be relevant in the case of directional selection,

$$136 \quad F_k(x) = a_k x + b_k \quad (2a),$$

$$137 \quad C_k(x, y) = \text{Exp}(-c_k (y - x)) \quad (3a),$$

138 and the following model may be relevant in the case of stabilizing selection,

$$139 \quad F_k(x) = a_k (x - z_k)^2 + b_k \quad (2b),$$

$$140 \quad C_k(x, y) = \text{Exp}(-c_k (y - z_k)^2) / \text{Exp}(-c_k (x - z_k)^2) \quad (3b),$$

141 where  $z_k$  is an optimum intermediary trait value. Likewise the following model may be relevant in the case  
142 of disruptive selection,

$$143 \quad F_k(x) = a_k (x - z_k)^2 + b_k \quad (2c),$$

$$144 \quad C_k(x, y) = (1 - m_k) (1 - \text{Exp}(-c_k (y - z_k)^2)) / (1 - \text{Exp}(-c_k (x - z_k)^2)) + m_k \quad (3c),$$

145 where  $z_k$  is a minimum intermediary trait value with fitness  $m_k$ . But generally a number of different  $F_k(x)$   
146 and  $C_k(x, y)$  functions may be conceived depending on the specific plant ecological case (also see Laughlin  
147 et al., 2015).

148 The effects of the  $m$  traits on plant population growth is here assumed to be additive; but see the later  
149 discussion on the possibilities of relaxing this important assumption.

150 The different selection models may be fitted to longitudinal plant relative abundance data by specifying the  
151 relevant likelihood function. Since the predicted cover of plant species  $j$  in eq. 1 is not bounded between  
152 zero and one, the predicted cover was fitted to the observed cover using a normal distribution, where the  
153 standard deviation was scaled by the observed cover times one minus the observed cover, i.e.

154  $\varepsilon \sim N(0, q_j(1 - q_j)\sigma)$ . For example, in the case of fitting the directional selection, models (2a) and (3a) are

155 inserted into (1) the resulting likelihood function is,

$$156 \quad L(\mathbf{a}, \mathbf{b}, \mathbf{c}, \sigma) = \prod_{i=1}^N \prod_{j=1}^n \frac{1}{\sqrt{2\pi} q_{j,t+1} (1 - q_{j,t+1}) \sigma} \text{Exp} \left( - \frac{(q'_{j,t} - q_{j,t+1})^2}{(q_{j,t+1} (1 - q_{j,t+1}) \sigma)^2} \right) \quad (4).$$



157 Most importantly, the parameter,  $\sigma$ , estimates the structural variance in the change in cover, which is the  
158 variance that is not explained by the model (1), and may consequently be used to get an estimate on the  
159 quantitative importance of the simplifying assumptions used in the modelling process.

## 160 **Demonstration with a toy example**

161 In order to present and discuss the nature of the underlying assumptions and illustrate the possible use of  
162 the model, the above-outlined method was applied on a simple toy example of a realistic data type.

163 An arbitrary species-traits matrix with ten species and three traits,  $\mathbf{T}_{10,3}$ , was constructed with random  
164 integer values (Table 1) and using an arbitrary directional selection scheme of the population growth based  
165 on the values of the three traits,  $5(x_1 - \bar{x}_1) + 3(x_2 - \bar{x}_2) - 2(x_3 - \bar{x}_3) + 100$ , where  $x_k$  is the trait value  
166 of trait  $k$ . The initial cover of ten species was generated for a hundred plots using a Dirichlet distribution  
167 with all parameters set to one. The selection scheme was used on the generated initial covers of the  
168 hundred plots and afterwards normalized to obtain resulting cover values that sum up to one for each plot.  
169 Only the species-trait matrix,  $\mathbf{T}_{10,3}$ , and the initial cover data,  $\mathbf{q}_{i,1}$ , and resulting cover data,  $\mathbf{q}_{i,2}$ , at plot  $i$   
170 ( $i = 1, \dots, 100$ ) were used in the further analysis, thus resembling the conditions in a real plant ecological  
171 study.

172 The joint posterior distribution of the parameters in likelihood function (4) was simulated using a Bayesian  
173 MCMC algorithm (Metropolis-Hastings), where the parameters were assumed to have a uniform prior  
174 distribution, except for  $\sigma$ , where the prior was assumed to have an inverse gamma distributed with the  
175 parameters 0.001 and 0.001. The MCMC iterations had fair mixing properties and were judged to have  
176 converged to a stable joint posterior distribution after a lag phase of 50.000 iterations (results not shown).  
177 The joint posterior distribution was estimated from 50.000 iterations after the lag phase.

178 Statistical inferences on the individual parameters were based on the 95% credible intervals of the marginal  
179 posterior distributions. All calculations were done using *Mathematica* version 10 (Wolfram, 2015).

180 The generated cover data was successfully fitted by likelihood function (4) and the marginal posterior  
181 distributions of the parameters are summarized in Table 2. There were significant differences among  
182 several of the growth parameters and all nine growth parameters differed significantly from zero (Table 1).  
183 This indicates, although by using artificially generated plant cover data, that it is possible to estimate the  
184 effect of traits on population growth with an acceptable signal-to-noise relationship when fitted to hundred  
185 plots, which is a realistic number of replicates in ecological studies.

186 The covariance matrix of the joint posterior distribution and the graphs of the parameter iterations (not  
187 shown) showed almost no covariance between  $a_k$  and  $c_k$ . This generally indicates that it is possible to  
188 partition direct population growth and population growth that is mediated by interspecific interaction.

## 189 Discussion

190 Most importantly, a number of quite specific assumptions on the nature of selection and how the different  
191 traits interact (eqn. 1, 2 and 3), is needed to set up the model and to meet the objectives of the empirical  
192 modelling, i.e. to estimate the selection forces on traits while at the same time to discriminate between  
193 environmental filtering and niche partitioning processes. Such a modelling approach is in sharp contrast to  
194 the more simple and elegant maximum entropy models, where it is not necessary to specify detailed  
195 models on selection forces and how the different traits interact (Shipley, 2010a; Shipley, 2010b).

196 Consequently, in the modelling approach presented in this study it is critical to assess or test the different  
197 necessary assumptions using either prior knowledge or model selection techniques.

198 As an additional tool in the model selection process valuable information may be obtained by estimates the  
199 structural variance, which is the variance that is not explained by the model and the underlying  
200 assumptions. If the structural variance is relative small then this is indirect evidence that the underlying  
201 assumptions to a certain degree are supported by the data. In the presented simple case-study the median  
202 estimate of the structural standard deviation was 0.0984 (Table 2), which should be compared with the

203 expected cumulative cover changes of ten species with three traits. However, more worked-out empirical  
204 examples of real data are needed in order to assess the importance of this level of structural variation.  
205 Finally, the conclusions of the model should of course be compared with independent information or  
206 hypotheses on the nature of trait selection.

207 For simplification it is assumed in model (1) that there is no significant intra-specific trait variation (but see  
208 Laughlin et al., 2012) or intra-specific variation in population growth rate. Generally, using model selection  
209 techniques, it will be possible to test what type of selection (directional selection, stabilizing selection, or  
210 disruptive selection) is best supported by the data and, consequently, to generate and test hypothesis on  
211 trait based assembly rules and possible mechanisms underlying plant species coexistence. Furthermore, if  
212 plant abundance of perennial plants is measured several times during a growth season, e.g. in spring and  
213 autumn, then the trait selection processes during summer growth may be estimated independently from  
214 the trait selection processes during over-wintering and, consequently, allows the generation and testing of  
215 temporal coexistence mechanisms (storage effects, Chesson, 2000).

216 Regarding the used assumption on the interactions between traits, model (1) assumes additivity among the  
217 traits in regulating population growth. Generally, little information exists on the interaction among traits  
218 (Kraft et al., 2015b), but the covariance matrix of the estimated selection coefficients  $a_k$  and  $c_k$  may give  
219 important insight on the selection forces operating on a suite of correlated plant traits, e.g. specific leaf  
220 area and leaf dry matter content, as previously demonstrated by e. g. Lande and Arnold Lande (1983).  
221 Again, the above-discussed model selection techniques may be used to discriminate between different  
222 hypotheses, and in the case that some modes of interactions are not supported by data it may be  
223 concluded that new ecological insight has been established.

224 In the presented simple demonstration case, the used cover data were generated assuming a uniform  
225 environment, but if the cover data had been sampled along an environmental gradient, then the selection  
226 models (2) can be made dependent on the environmental gradient; and the effect of traits on population

227 growth can then be estimated as functions of the environmental gradient. In similar ways, the selection  
228 models (2) can be modified to fit many different ecological circumstances and the demonstrated model in  
229 this paper is only one possibility of a large class of models that may be fitted using the outlined  
230 methodology. The model is currently being used to examine the effect of plant competition on trait  
231 selection along a hydrological gradient (Damgaard et al, in prep.)

232 Generally, it will be possible to generate ecological predictions with a known degree of uncertainty from  
233 the outlined trait selection model by inserting values from the joint posterior distribution of the parameters  
234 into numerical iterations or a numerical solution of equation (1). Such ecological predictions may be used  
235 directly in applied plant ecological questions, e.g. effects of climate change, pesticides, or nitrogen  
236 deposition on plant communities.

237 The outlined trait selection model is a one-step trait selection process that only operates locally and is,  
238 thus, conceptually simpler than the two-step process meta-community model that previously has been  
239 used (e.g. Bernard-Verdier et al., 2012; Webb et al., 2010). One of the advantages of this simpler model is  
240 that it allows ecological predictions to be generated without knowledge on meta-community dynamics  
241 which, typically, is unknown. The data requirements of the presented model are modest, i.e. time series  
242 data on plant species abundance and a species – trait matrix. Consequently, the model may be used to  
243 model trait selection, including the effect of interspecific interactions, in many existing plant ecological  
244 datasets. Naturally, the method is extendable so that time series longer than two years or time series data  
245 with irregular sampling intervals also may be fitted.

246 In the used modelling approach interspecific interactions are measured directly using time series plant  
247 abundance data as the effect neighboring plants have on growth (Damgaard, 2011; Damgaard et al., 2009;  
248 Damgaard et al., 2013; Damgaard et al., 2014), and this allows us to model the underlying ecological  
249 processes. In my opinion, the filter analogy has been overused in empirical plant ecological trait literature,  
250 e.g. when loosely referring to a “competitive filter” or “biotic filter” without specifying the details of the

251 underlying ecological processes (Kraft et al., 2015a). Since multiple assembly processes can lead to the  
252 same pattern of trait dispersion and the same process can lead to different patterns of trait dispersion  
253 (Herben and Goldberg, 2014), it is a clear advantage of the outlined model that it operates on the process  
254 level and that it is possible to mathematically describe the details of different ecological processes within  
255 the framework.

## 256 **Acknowledgement**

257 Thanks to Zdeněk Janovský and anonymous reviewers for valuable comments on a previous version of the  
258 manuscript.

259 **Tables and figures**

260 Table 1. The used species-traits matrix with ten species and three traits,  $T_{10,3}$ .

| Species | Trait 1 | Trait 2 | Trait 3 |
|---------|---------|---------|---------|
| 1       | 3       | 2       | 3       |
| 2       | 2       | 4       | 2       |
| 3       | 4       | 1       | 6       |
| 4       | 7       | 5       | 3       |
| 5       | 2       | 3       | 8       |
| 6       | 9       | 4       | 4       |
| 7       | 2       | 3       | 6       |
| 8       | 4       | 6       | 5       |
| 9       | 6       | 3       | 1       |
| 10      | 5       | 1       | 5       |

261

262

263 Table 2. The marginal distribution of the parameters of likelihood function (4) summarized by their 2.5%,  
264 50%, 97.5% percentiles and the probability that the parameter is larger than zero.

| Parameter | 2.5%    | 50%     | 97.5%   | P(X > 0) |
|-----------|---------|---------|---------|----------|
| $a_1$     | 0.0911  | 0.0952  | 0.1011  | 1        |
| $a_2$     | 0.0907  | 0.0957  | 0.1003  | 1        |
| $a_3$     | 0.0615  | 0.0658  | 0.0696  | 1        |
| $b_1$     | 0.0019  | 0.0038  | 0.0063  | 1        |
| $b_2$     | 0.0001  | 0.0012  | 0.0032  | 0.986    |
| $b_3$     | 0.0033  | 0.0052  | 0.0070  | 1        |
| $c_1$     | -0.0894 | -0.0817 | -0.0740 | 0        |
| $c_2$     | -0.2092 | -0.1968 | -0.1818 | 0        |
| $c_3$     | -0.3053 | -0.2933 | -0.2820 | 0        |
| $\sigma$  | 0.0941  | 0.0984  | 0.1029  | 1        |

265

266

267

268

269 Fig. 1. Conceptual figure of the one-step selection model, where  $q_j$  is the cover of plant species  $j$  with trait  
270 values  $t_k = x$ ,  $q'_j$  is the predicted cover of plant species  $j$  the following year under the influence of both  
271 direct selection forces,  $F(x)$ , and selection forces mediated by interspecific interactions,  $C(x, y)$ .

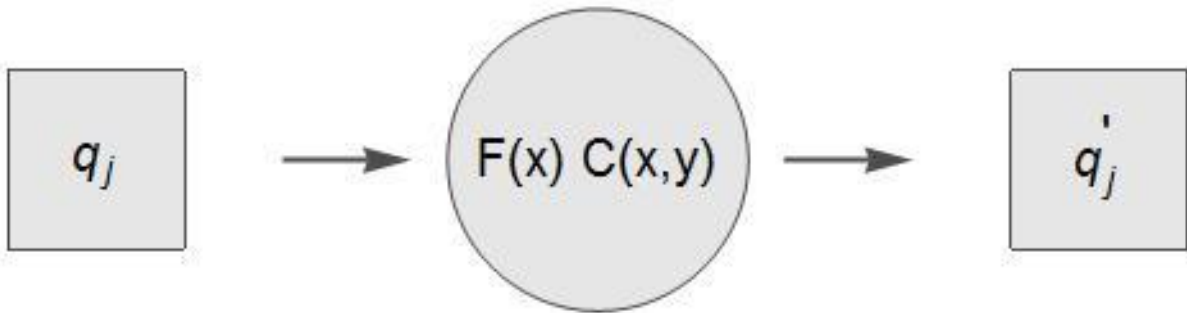

272



## 273 **References**

- 274 Adler, P. B., et al., 2013. Trait-based tests of coexistence mechanisms. *Ecology Letters*. 16, 1294-1306.
- 275 Bernard-Verdier, M., et al., 2012. Community assembly along a soil depth gradient: contrasting patterns of  
276 plant trait convergence and divergence in a Mediterranean rangeland. *Journal of Ecology*. 100,  
277 1422-1433.
- 278 Baastrop-Spohr, L., et al., 2015. From soaking wet to bone dry: predicting plant community composition  
279 along a steep hydrological gradient. *Journal of Vegetation Science*. 26, 619-630.
- 280 Chesson, P., 2000. Mechanisms of maintenance of species diversity. *Annual Review of Ecology and*  
281 *Systematics*. 31, 343-366.
- 282 Damgaard, C., 2011. Measuring competition in plant communities where it is difficult to distinguish  
283 individual plants. *Computational Ecology and Software*. 1, 125-137.
- 284 Damgaard, C., et al., 2009. Estimating plant competition coefficients and predicting community dynamics  
285 from non-destructive pin-point data: a case study with *Calluna vulgaris* and *Deschampsia flexuosa*.  
286 *Plant Ecology*. 201, 687–697.
- 287 Damgaard, C., et al., 2013. The effect of nitrogen and glyphosate on survival and colonisation of perennial  
288 grass species in an agro-ecosystem: does the relative importance of survival decrease with  
289 competitive ability? *PLoS One*. 8, e60992.
- 290 Damgaard, C., et al., 2014. The effect of glyphosate on the growth and competitive effect of perennial grass  
291 species in semi-natural grasslands. *J Environ Sci Health B*. 49, 897-908.
- 292 Garnier, E., et al., 2004. PLANT FUNCTIONAL MARKERS CAPTURE ECOSYSTEM PROPERTIES DURING  
293 SECONDARY SUCCESSION. *Ecology*. 85, 2630-2637.
- 294 Garnier, E., et al., 2007. Assessing the effects of land-use change on plant traits, communities and  
295 ecosystem functioning in grasslands: a standardized methodology and lessons from an application  
296 to 11 European sites. *Annals of Botany*. 99, 967–985.

- 297 Garnier, E., et al., 2016. Plant functional diversity. Organism traits, community structure, and ecosystem  
298 properties. Oxford University Press, Oxford, UK.
- 299 Goldberg, D. E., et al., Components of resource competition in plant communities. In: J. Grace, D. Tilman,  
300 Eds.), Perspective on plant competition. Academic press, San Diego, 1990, pp. 27-49.
- 301 Gotelli, N., McCabe, D. J., 2002. Species co-occurrence: a meta-analysis of J. M. Diamond's assembly rules  
302 model. *Ecology*. 83, 2091-2096.
- 303 Herben, T., Goldberg, D. E., 2014. Community assembly by limiting similarity vs. competitive hierarchies:  
304 testing the consequences of dispersion of individual traits. *Journal of Ecology*. 102, 156-166.
- 305 Hutchinson, G. E., 1957. Concluding remarks. *Cold Spring Harb Symp Quant Biol*. 22, 415-427.
- 306 Kraft, N. J. B., et al., 2015a. Community assembly, coexistence and the environmental filtering metaphor.  
307 *Functional Ecology*. 29, 592-599.
- 308 Kraft, N. J. B., et al., 2015b. Plant functional traits and the multidimensional nature of species coexistence.  
309 *Proceedings of the National Academy of Sciences*. 112, 797-802.
- 310 Lande, R., Arnold, S. J., 1983. The measurement of selection on correlated characters. *Evolution*. 37, 1210-  
311 1226.
- 312 Laughlin, D. C., et al., 2015. Quantifying multimodal trait distributions improves trait-based predictions of  
313 species abundances and functional diversity. *Journal of Vegetation Science*. 26, 46-57.
- 314 Laughlin, D. C., et al., 2012. A predictive model of community assembly that incorporates intraspecific trait  
315 variation. *Ecology Letters*. 15, 1291-1299.
- 316 Lavorel, S., Garnier, E., 2002. Predicting changes in community composition and ecosystem functioning  
317 from plant traits: revisiting the Holy Grail. *Functional Ecology*. 16, 545-556.
- 318 Mayfield, M. M., Levine, J. M., 2010. Opposing effects of competitive exclusion on the phylogenetic  
319 structure of communities. *Ecology Letters*. 13, 1085-1093.
- 320 Shipley, B., 2010a. From plant traits to vegetation structure. Cambridge University Press, Cambridge.

- 321 Shipley, B., 2010b. Inferential permutation tests for maximum entropy models in ecology. *Ecology*. 91,  
322 2794-2805.
- 323 Silvertown, J., et al., 1999. Hydrologically defined niches reveal a basis for species richness in plant  
324 communities. *Nature*. 400, 61-63.
- 325 Turnbull, L. A., et al., 2004. Seed mass and the competition/colonization trade-off: competitive interactions  
326 and spatial patterns in a guild of annual plants. *Journal of Ecology*. 92, 97-109.
- 327 Webb, C. T., et al., 2010. A structured and dynamic framework to advance traits-based theory and  
328 prediction in ecology. *Ecol Lett*. 13, 267-83.
- 329 Weiher, E., et al., 1998. Community assembly rules, morphological dispersion, and the coexistence of plant  
330 species. *Oikos*. 81, 309-322.
- 331 Weiher, E., et al., 2011. Advances, challenges and a developing synthesis of ecological community assembly  
332 theory. *Philosophical Transactions of the Royal Society B: Biological Sciences*. 366, 2403-2413.
- 333 Weiner, J., 1986. How competition for light and nutrients affects size variability in *Ipomoea tricolor*  
334 populations. *Ecology*. 67, 1425-1427.
- 335 Wolfram, S., *Mathematica*. Wolfram Research, Inc., Champaign, USA, 2015.
- 336
